# Supplementary material for: Integrative analysis of miRNA and gene expression reveals regulatory networks in tamoxifen-resistant breast cancer
Source: PubMed Central journal article supplement (PMC5302986; doi:10.18632/oncotarget.11136), 2016-08-09
Supplement: oncotarget-07-57239-s001.pdf [file oncotarget-07-57239-s001.pdf]

## Integrative analysis of miRNA and gene expression reveals regulatory networks in tamoxifen-resistant breast cancer

### SUPPLEMENTARY FIGURES AND TABLES

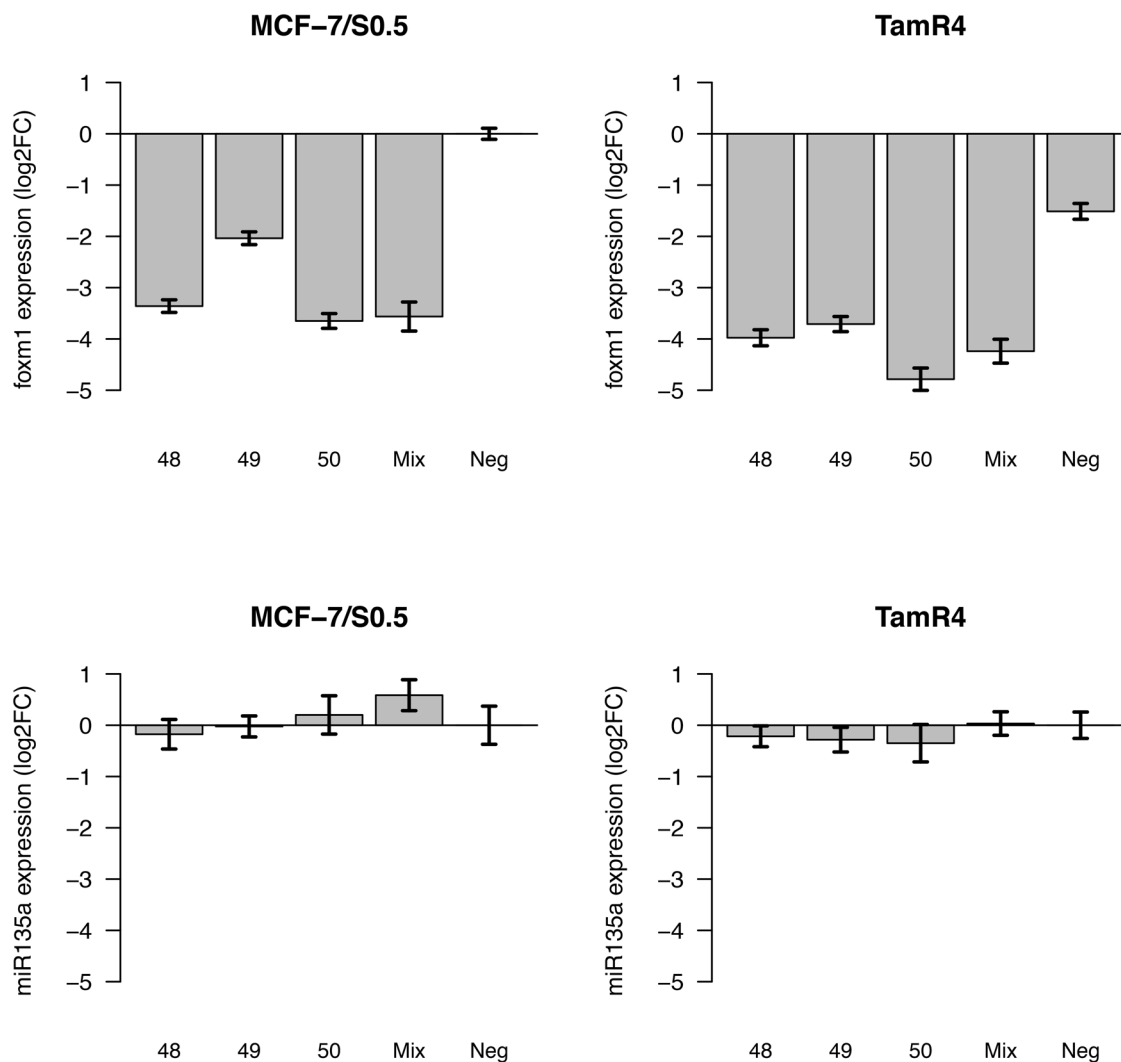

**Supplementary Figure 1: Knockdown of FOXM1 identified to exhibit higher expression in MCF-7/S0.5 vs. TamR4 and the effect on miR-135a levels.** (top panel) MCF-7/S0.5 and TamR4 cells were transfected with 3 siRNAs specific for FOXM1 either as single siRNAs: 48, 49, 50 or a mixture of all the siRNAs (Mix). All FOXM1-specific siRNAs lead to a statistically significant ( $P < 0.01$ ) reduction in gene expression compared with cells transfected with control siRNA (Neg). (lower panel) Knockdown of FOXM1 with specific siRNA vs. negative control lead to no significant alteration of miR-135a expression in both cell lines.

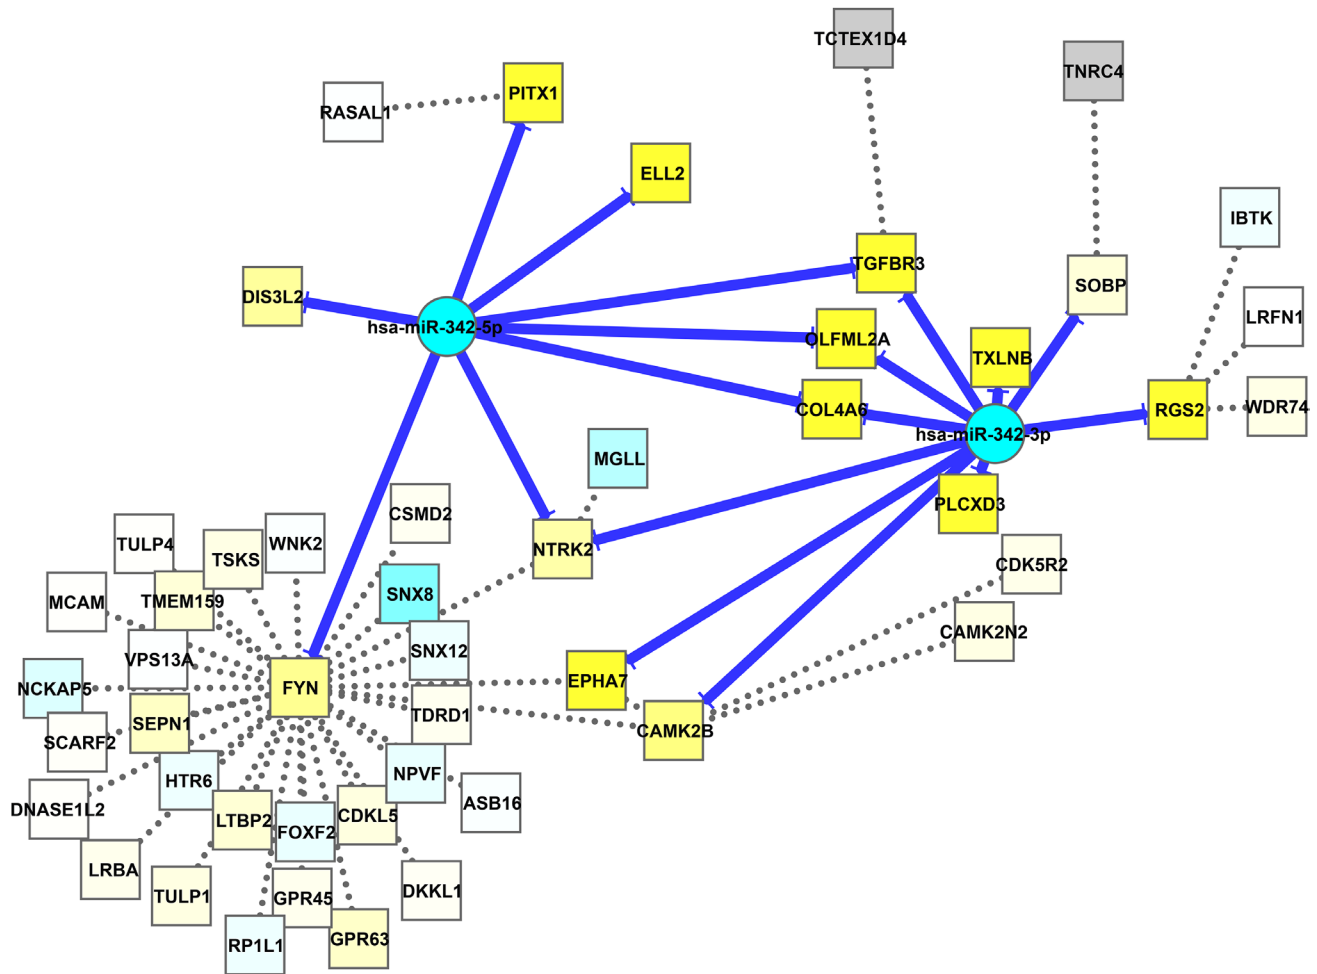

**Supplementary Figure 2: miRNA-mediated gene regulation events associated with tamoxifen resistance focusing on miR-342-3p/5p.** Fourteen predicted functional targets of miR-342-3p/5p, including *FYN*, *TGFBR1*, *COL4A6*, *CDKN1A*, and Ephrins *EPHA4/7* were identified in the tamoxifen-resistant cell lines. Color and intensity of the nodes correspond to the extent of fold-changes observed in the relevant comparison.

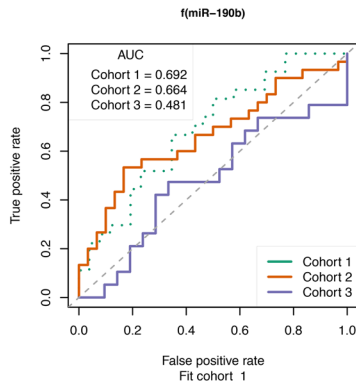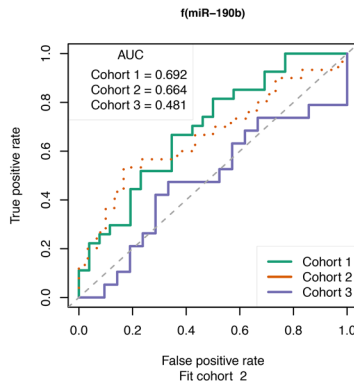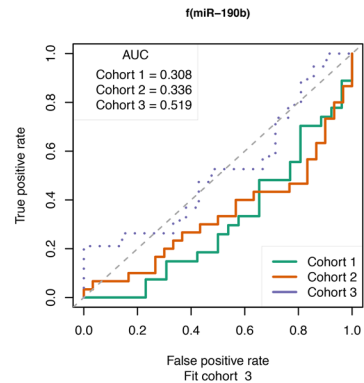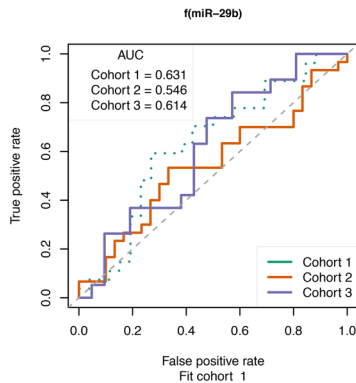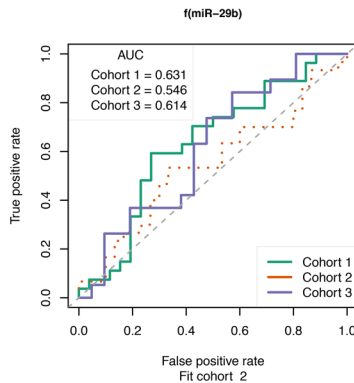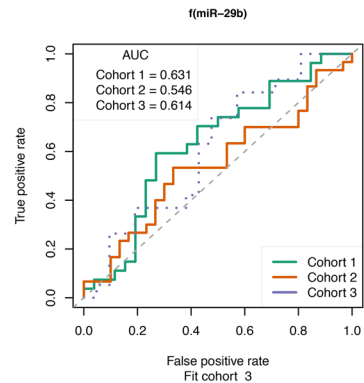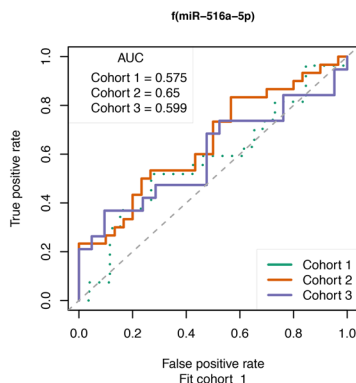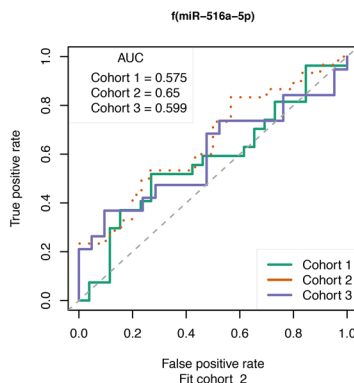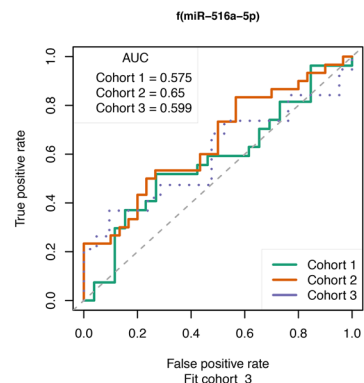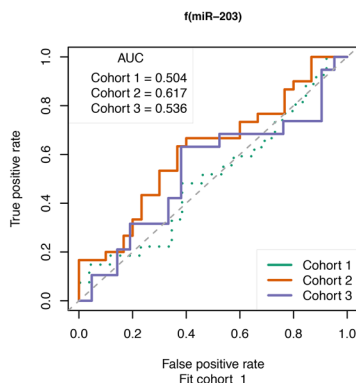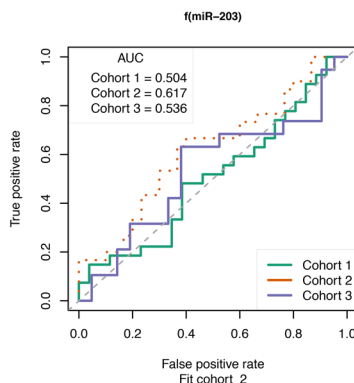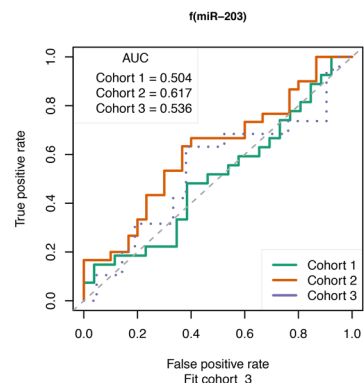

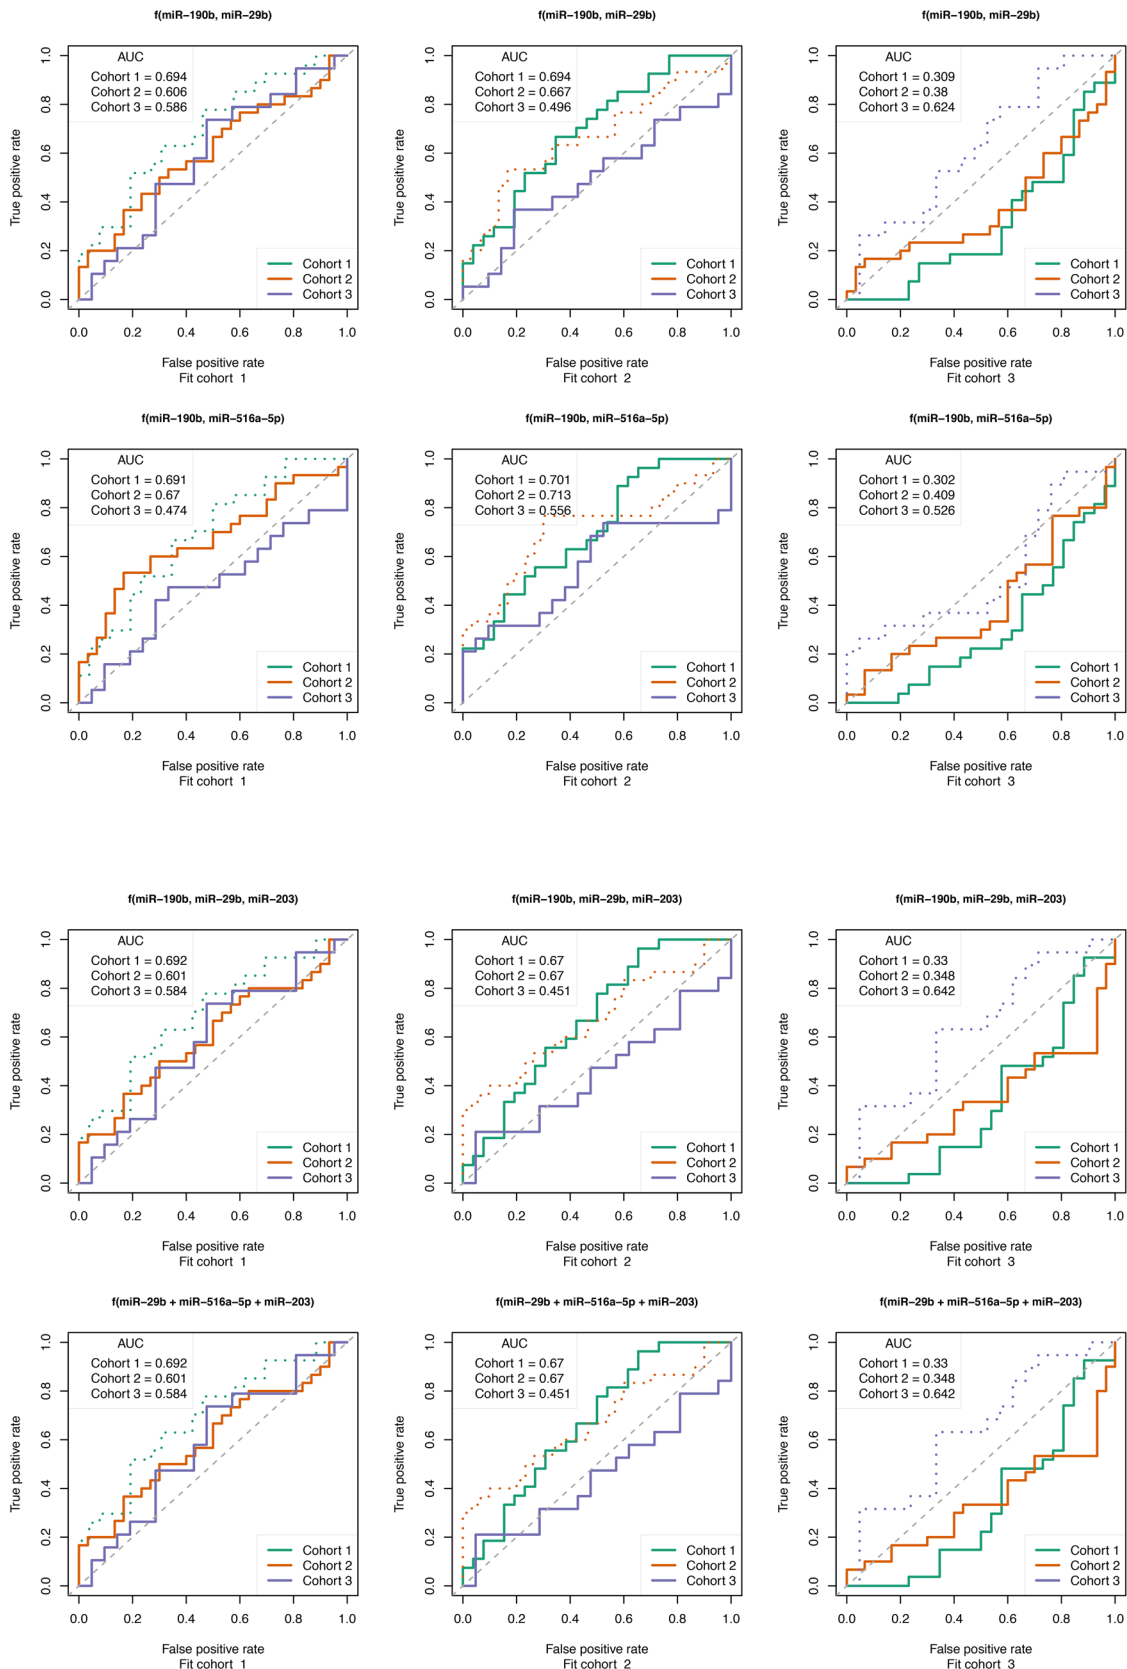

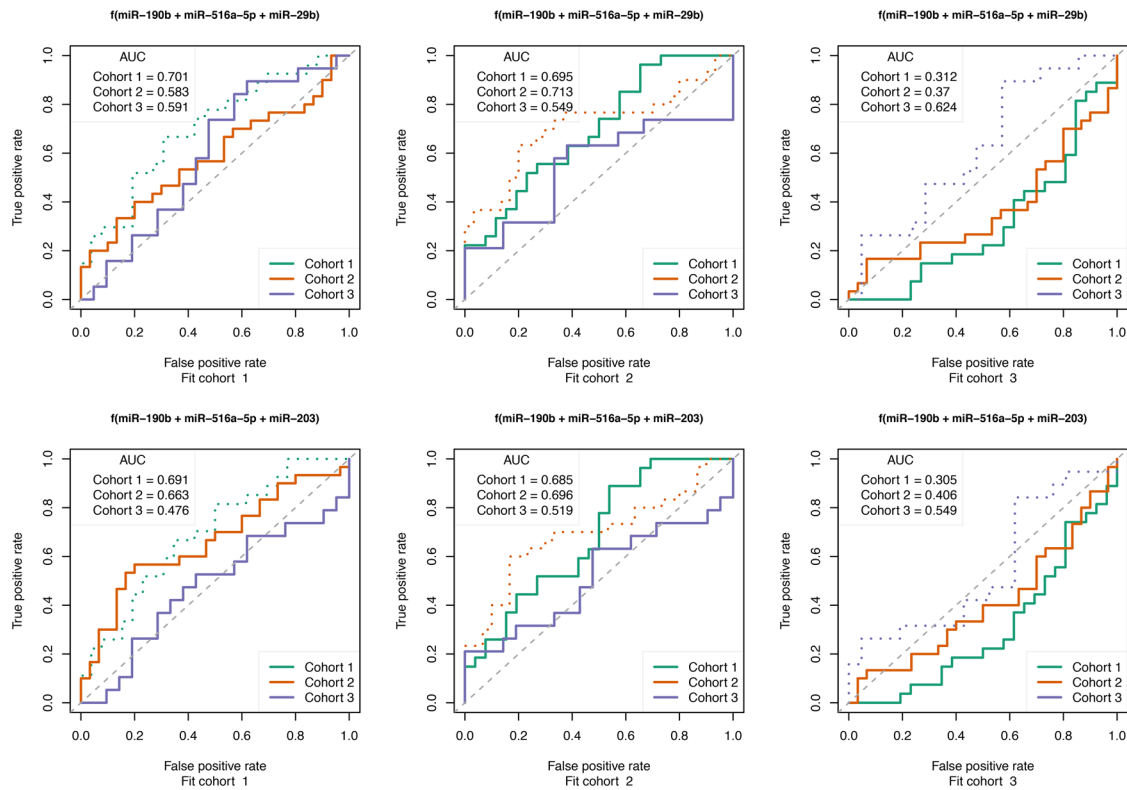

**Supplementary Figure 3: ROC curve analysis to assess the prognostic power of miRNAs in an ER+ breast cancer cohort of patients receiving tamoxifen monotherapy.** Selected miRNAs that exhibited altered expression in TamRs vs. MCF-7/S0.5 cell lines were also predictive of recurrence following tamoxifen treatment. The differentially expressed miRNA; miR-190b, miR-29b, miR-516a-5p, and miR-203, as single or combinations of miRNAs, were fit on each cohort (Fit cohort) and then applied to all cohorts independently. Training performance is assessed when Fit cohort and test cohorts are the same (dotted lines) while independent test set performance is observed when they differ (solid lines).

**Supplementary Table 1: MiRNAs with significantly altered expression profiles in tamoxifen resistant cell lines relative to the parental MCF-7/S0.5 cell line**

| Contrast (relative to MCF-7/S0.5 cell line) | Differentially expressed miRNAs                                                                                                                                                                                                                                                                                                                                                                                                                                                                                                                                                                                                                                                                                                                                                                                                                                                                                                                                                                                                                         |
|---------------------------------------------|---------------------------------------------------------------------------------------------------------------------------------------------------------------------------------------------------------------------------------------------------------------------------------------------------------------------------------------------------------------------------------------------------------------------------------------------------------------------------------------------------------------------------------------------------------------------------------------------------------------------------------------------------------------------------------------------------------------------------------------------------------------------------------------------------------------------------------------------------------------------------------------------------------------------------------------------------------------------------------------------------------------------------------------------------------|
| TAMR1                                       | miR-101*, miR-1201, miR-1203, miR-1248, miR-130b, miR-130b*, miR-132, miR-135a, miR-135b, miR-142-3p, miR-152, miR-153, miR-181b, miR-182*, miR-18a, miR-1913, miR-192, miR-196a, miR-196b, miR-1979, miR-199b-5p, miR-200a*, miR-203, miR-21, miR-210, miR-212, miR-215, miR-218, miR-22, miR-22*, miR-220b, miR-23b, miR-24-1*, miR-26b*, miR-296-3p, miR-339-5p, miR-33b, miR-345, miR-34b, miR-362-5p, miR-365, miR-378, miR-378*, miR-450a, miR-499-5p, miR-500, miR-501-3p, miR-502-5p, miR-516a-5p, miR-517b, miR-517c, miR-519a, miR-519b-3p, miR-519e, miR-519e*, miR-522, miR-542-5p, miR-551b, miR-577, miR-582-5p, miR-593, miR-598, miR-611, miR-649, miR-652, miR-663b, miR-665, miR-943, miR-95                                                                                                                                                                                                                                                                                                                                          |
| TAMR4                                       | miR-1, miR-101, miR-101*, miR-106b*, miR-1201, miR-1248, miR-1259, miR-1271, miR-130b, miR-130b*, miR-135a, miR-135b, miR-138, miR-141, miR-141*, miR-143, miR-149, miR-149*, miR-152, miR-153, miR-181a*, miR-181b, miR-181c, miR-183, miR-18a, miR-18a*, miR-18b, miR-190, miR-1908, miR-190b, miR-191*, miR-192*, miR-193a-3p, miR-196a, miR-196b, miR-1979, miR-200a, miR-203, miR-21, miR-210, miR-2113, miR-212, miR-218, miR-22*, miR-26a, miR-26a-2*, miR-26b*, miR-296-3p, miR-29a, miR-29b, miR-29b-1*, miR-29c*, miR-30a, miR-30b, miR-30d, miR-330-3p, miR-337-3p, miR-339-5p, miR-33a*, miR-33b, miR-33b*, miR-342-3p, miR-342-5p, miR-345, miR-365, miR-424, miR-424*, miR-425*, miR-455-5p, miR-499-5p, miR-503, miR-505, miR-516a-5p, miR-517c, miR-519a, miR-519e, miR-520d-3p, miR-522, miR-524-5p, miR-548k, miR-551b, miR-580, miR-582-5p, miR-600, miR-605, miR-622, miR-628-5p, miR-629*, miR-636, miR-649, miR-652, miR-664, miR-665, miR-671-3p, miR-671-5p, miR-7, miR-708, miR-720, miR-760, miR-940, miR-941, miR-95, miR-96 |
| TAMR8                                       | let-7i, let-7i*, miR-101, miR-101*, miR-106b, miR-106b*, miR-1201, miR-1203, miR-1237, miR-1248, miR-126, miR-129*, miR-130b, miR-130b*, miR-135a, miR-135b, miR-142-3p, miR-143, miR-149, miR-152, miR-181b, miR-182, miR-182*, miR-183, miR-18a*, miR-1908, miR-190b, miR-192, miR-194, miR-196a, miR-197, miR-203, miR-205, miR-20b, miR-21*, miR-210, miR-215, miR-218, miR-219-5p, miR-22, miR-22*, miR-23a, miR-23a*, miR-23b, miR-23b*, miR-24-1*, miR-24-2*, miR-26a, miR-27a, miR-29a*, miR-29b-1*, miR-30a, miR-328, miR-335, miR-339-5p, miR-340, miR-342-3p, miR-342-5p, miR-34a*, miR-363, miR-375, miR-378, miR-378*, miR-423-3p, miR-424, miR-449a, miR-450a, miR-455-3p, miR-455-5p, miR-491-5p, miR-503, miR-516a-5p, miR-517c, miR-519a, miR-519e, miR-519e*, miR-551b, miR-574-3p, miR-577, miR-582-5p, miR-590-5p, miR-598, miR-611, miR-625*, miR-628-3p, miR-652, miR-708, miR-720, miR-877*, miR-93, miR-93*, miR-941, miR-942, miR-95, miR-96                                                                                   |

Absolute log-ratio of expression  $\geq 0.7$  and adjusted p-value  $\leq 0.05$ .

**Supplementary Table 2: Overlap of differentially expressed miRNAs TamR cell lines as measured by qPCR assays**

|                                    |                                                                                                                                                                                                        |
|------------------------------------|--------------------------------------------------------------------------------------------------------------------------------------------------------------------------------------------------------|
| TAMR1 DOWN. TAMR4 DOWN             | miR-101*,miR-1201,miR-1248,miR-135a,miR-135b,miR-153,miR-196a,miR-218,miR-33b,miR-499-5p,miR-649,miR-652,miR-95                                                                                        |
| TAMR1 DOWN. TAMR4 UP               | miR-665                                                                                                                                                                                                |
| TAMR1 DOWN. TAMR8 DOWN             | miR-101*,miR-1201,miR-1248,miR-135a,miR-135b,miR-182*,miR-196a,miR-23b,miR-24-1*,miR-378,miR-378*,miR-519e*,miR-577,miR-611,miR-652,miR-95                                                             |
| TAMR1 UP. TAMR4 DOWN               | miR-196b,miR-21                                                                                                                                                                                        |
| TAMR1 UP. TAMR4 UP                 | miR-130b,miR-130b*,miR-152,miR-181b,miR-18a,miR-1979,miR-203,miR-210,miR-212,miR-22*,miR-26b*,miR-296-3p,miR-339-5p,miR-345,miR-365,miR-516a-5p,miR-517c,miR-519a,miR-519e,miR-522,miR-551b,miR-582-5p |
| TAMR1 UP. TAMR8 UP                 | miR-1203,miR-130b,miR-130b*,miR-142-3p,miR-152,miR-181b,miR-192,miR-203,miR-210,miR-215,miR-22,miR-22*,miR-339-5p,miR-450a,miR-516a-5p,miR-517c,miR-519a,miR-519e,miR-551b,miR-582-5p,miR-598          |
| TAMR4 DOWN. TAMR8 DOWN             | miR-101,miR-101*,miR-1201,miR-1248,miR-135a,miR-135b,miR-143,miR-183,miR-190b,miR-196a,miR-29b-1*,miR-342-3p,miR-342-5p,miR-424,miR-503,miR-652,miR-708,miR-95,miR-96                                  |
| TAMR4 DOWN. TAMR8 UP               | miR-218,miR-26a,miR-30a                                                                                                                                                                                |
| TAMR4 UP. TAMR8 DOWN               | miR-106b*                                                                                                                                                                                              |
| TAMR4 UP. TAMR8 UP                 | miR-130b,miR-130b*,miR-149,miR-152,miR-181b,miR-18a*,miR-1908,miR-203,miR-210,miR-22*,miR-339-5p,miR-455-5p,miR-516a-5p,miR-517c,miR-519a,miR-519e,miR-551b,miR-582-5p,miR-720,miR-941                 |
| TAMR1 DOWN. TAMR4 DOWN. TAMR8 DOWN | miR-101*,miR-1201,miR-1248,miR-135a,miR-135b,miR-196a,miR-652,miR-95                                                                                                                                   |
| TAMR1 DOWN. TAMR4 DOWN. TAMR8 UP   | miR-218                                                                                                                                                                                                |
| TAMR1 UP. TAMR4 UP. TAMR8 UP       | miR-130b,miR-130b*,miR-152,miR-181b,miR-203,miR-210,miR-22*,miR-339-5p,miR-516a-5p,miR-517c,miR-519a,miR-519e,miR-551b,miR-582-5p                                                                      |

**Supplementary Table 3: List of miRNAs with altered expression in TamR cell lines as detected by smallRNAseq**

See Supplementary File 1



**Supplementary Table 4: Overlap and differences between qPCR and sequencing based measures of altered miRNA expression**

| <b>Agreement between qPCR and small-RNAseq</b>     |                                                                                                                                                                                                                                                                                                                                                                                                                                                                    |
|----------------------------------------------------|--------------------------------------------------------------------------------------------------------------------------------------------------------------------------------------------------------------------------------------------------------------------------------------------------------------------------------------------------------------------------------------------------------------------------------------------------------------------|
| TAMR1_up                                           | miR-130b, miR-130b*, miR-132, miR-152, miR-196b, miR-1979, miR-203, miR-212, miR-22, miR-26b*, miR-339-5p, miR-345, miR-450a, miR-501-3p, miR-516a-5p, miR-522, miR-542-5p, miR-598                                                                                                                                                                                                                                                                                |
| TAMR1_down                                         | miR-1201, miR-135a, miR-196a, miR-218, miR-23b, miR-24-1*, miR-378, miR-499-5p, miR-652, miR-95                                                                                                                                                                                                                                                                                                                                                                    |
| TAMR4_up                                           | miR-1271, miR-130b*, miR-149, miR-152, miR-18a, miR-18a*, miR-18b, miR-191*, miR-203, miR-210, miR-22*, miR-26b*, miR-339-5p, miR-33a*, miR-33b*, miR-345, miR-365, miR-516a-5p, miR-519a, miR-522, miR-551b, miR-580, miR-629*, miR-636, miR-671-3p, miR-671-5p, miR-760, miR-940, miR-941                                                                                                                                                                        |
| TAMR4_down                                         | miR-101, miR-1201, miR-1259, miR-135a, miR-141, miR-143, miR-181c, miR-183, miR-190, miR-190b, miR-196a, miR-218, miR-26a, miR-29a, miR-29b-1*, miR-30a, miR-30b, miR-30d, miR-330-3p, miR-342-3p, miR-342-5p, miR-424, miR-424*, miR-503, miR-548k, miR-652, miR-708, miR-95, miR-96                                                                                                                                                                              |
| TAMR8_up                                           | let-7i*, miR-130b*, miR-142-3p, miR-149, miR-152, miR-1908, miR-197, miR-203, miR-20b, miR-210, miR-22, miR-22*, miR-339-5p, miR-363, miR-375, miR-449a, miR-455-3p, miR-519a, miR-582-5p, miR-598, miR-628-3p, miR-941                                                                                                                                                                                                                                            |
| TAMR8_down                                         | miR-1201, miR-143, miR-190b, miR-196a, miR-29b-1*, miR-335, miR-342-5p, miR-378, miR-424, miR-652, miR-942, miR-95                                                                                                                                                                                                                                                                                                                                                 |
| <b>Differences between qPCR and small-RNAseq</b>   |                                                                                                                                                                                                                                                                                                                                                                                                                                                                    |
| Altered expression by small-RNAseq but not by qPCR | miR-1252, miR-127-3p, miR-206, miR-217, miR-224, miR-338-5p, miR-379, miR-491-3p, miR-492, miR-508-3p, miR-548j, miR-548l, miR-549, miR-556-3p, miR-573, miR-891a, miR-124*, miR-145*, miR-146a, miR-155*, miR-302a*, miR-302b, miR-302c, miR-372, miR-411, miR-518b, miR-548h, miR-370, miR-432, miR-449b, miR-514, <b>miR-105, miR-10a, miR-10b, miR-122, miR-184, miR-34c-5p, miR-452, miR-556-5p, miR-886-5p, miR-361-5p, miR-486-3p, miR-103-as, miR-144*</b> |

(absolute logFC  $\geq 0.7$ ,  $p \leq 0.05$ , where applicable). MiRNAs listed in bold failed the QC by qPCR (Cp >37).

**Supplementary Table 5: Highly relevant functional miRNA-target relationship inferred by inverse-correlation analysis. The miRNA-target pairs in the table were selected from the complete list of functional miRNA-targets due to their significant expression changes in the tamoxifen-resistant cell lines vs. MCF-7/S0.5 cell line**

See Supplementary File 2

Supplementary Table 6: Functional targets of miR-135b identified by inverse correlation analysis

| miRNA    | Functional targets                                                                                                                                                                                                                                                                                                                                                                                                                                                                                                                                                                                                                                                                                                                                                                                                                                                                                                                                                                                                                                                                                                                                                                                                                                                                                                                                                                                                                                                                                                                                                                                                                                                                                                                                                                                                                                                                                                                                                                                                                                                                                                                                                                                                                                                                                                                                                                                                                                                                                                                                                                                                                                                                                                                                                                                                                                                                                                                                                                                                                                                                                             |
|----------|----------------------------------------------------------------------------------------------------------------------------------------------------------------------------------------------------------------------------------------------------------------------------------------------------------------------------------------------------------------------------------------------------------------------------------------------------------------------------------------------------------------------------------------------------------------------------------------------------------------------------------------------------------------------------------------------------------------------------------------------------------------------------------------------------------------------------------------------------------------------------------------------------------------------------------------------------------------------------------------------------------------------------------------------------------------------------------------------------------------------------------------------------------------------------------------------------------------------------------------------------------------------------------------------------------------------------------------------------------------------------------------------------------------------------------------------------------------------------------------------------------------------------------------------------------------------------------------------------------------------------------------------------------------------------------------------------------------------------------------------------------------------------------------------------------------------------------------------------------------------------------------------------------------------------------------------------------------------------------------------------------------------------------------------------------------------------------------------------------------------------------------------------------------------------------------------------------------------------------------------------------------------------------------------------------------------------------------------------------------------------------------------------------------------------------------------------------------------------------------------------------------------------------------------------------------------------------------------------------------------------------------------------------------------------------------------------------------------------------------------------------------------------------------------------------------------------------------------------------------------------------------------------------------------------------------------------------------------------------------------------------------------------------------------------------------------------------------------------------------|
| miR-135b | TOM1L1, ATP9A, HIPK3, ACTR1A, NAMPT, G3BP1, MBNL2, TRIM13, BCAS2, BTN2A2, AGR2, ARFGEF2, SORBS1, EXOC5, GNA13, GNB5, ADCY1, NFAT5, TOB2, ZBTB6, FRS2, TMED10, ASCC3, MAPRE2, DIDO1, POLR3A, HHLA3, AKAP13, NXPH3, PRR4, CYP2U1, PIK3IP1, SLC2A13, KCTD12, ZFYVE27, ANKRD22, SLC15A4, CLTC, ZNF440, CMPK2, ACVR1C, COPA, CPD, ASB5, C2orf112, SMCR8, C1orf46, CSNK1A1, ZFP90, TOM1L2, WIPF2, SLC30A7, CNIH3, C2orf67, PRELID2, DAG1, CITED4, DDX3X, PRICKLE2, DCP2, DHX36, SYNPO2, DMRT1, ABAT, DUSP3, MEGF9, EIF5, CADM4, ELK3, TMEM192, EPHA4, HIPK1, CLN8, ABCD1, FANCF, ATAD3C, GPR115, C6orf89, FKBP1A, IKZF2, PHLDA1, ZNF652, ENPP4, CLSTN1, FOXJ3, ZNF365, DIS3, MAPRE1, DIP2C, PCNX, MAST3, XPO7, KIF21B, NMNAT2, SETX, TNRC6B, HIC2, GPATCH8, SMC5, DCUN1D4, JMJD6, PACS2, KIAA0556, IQCE, FBXW11, KIAA1033, DPY19L1, CRTCL1, EXOSC2, RYBP, RHOQ, ABCA5, BACE1, YTHDF3, RNF144B, GALC, ARIH1, ZNF385A, KBTBD2, C1orf144, CACNG4, AFF4, VPS4A, ZNF330, GLS, GM2A, BCL9L, PGM2L1, NUDT7, PTRF, GDPD1, ZIK1, CYP4V2, OSTM1, C16orf72, ORMDL2, GTF2F1, TMOD2, HADHA, HAS3, HIF1A, APC, ACADL, RGAG4, ZC3H12B, IL16, TRIM23, FAM111B, KCNG1, KCNS1, KCNS3, YPEL2, LASP1, LDLR, LIPA, LMAN1, LTBP2, ARNTL, CAPRIN1, SMAD3, SMAD5, ARSD, MB, MBNL1, MCL1, CD46, MAP3K3, RAB8A, MLL, MOV10, MTF1, MTHFR, NAB1, NAP1L2, ACLY, NEO1, NF1, NFX1, NOTCH2, NPAS2, OAS3, OGDH, ORC5L, ARHGEF3, F11R, PCDHGC3, TMED5, PCDH9, PHF20, MRPL30, ZNF117, CDC40, NIP7, POLK, ZNF107, PGGT1B, PIK3C2A, PI4KB, PIP4K2A, PITX2, ATP6V0A1, CSNK1G1, PION, KRT20, TMCO1, ATRX, MED1, PPIA, DNAJB12, MBTD1, PGPEP1, TMEM104, RNF43, WHSC1L1, ZNF434, C14orf119, C17orf80, PLEKHB2, VPS37C, PDPR, ELP3, PNPO, PPP2R1B, SETD5, SMU1, PCMTD2, ASXL2, SYNJ2BP, TBC1D2, PI4K2A, PPT1, GALNT10, BTBD2, TMEM127, PRPF40A, PRKCA, TRERF1, TEX2, CTTNBP2NL, MAPK1, PCDHGB5, PCDHGA10, PCDHGA1, PCDHB13, PCDHB10, MOSPD1, ZNF253, EIF5A2, BARHL1, CCDC47, TMEM159, ATP10D, LYRM2, KIAA1161, INTS2, NUFIP2, ZNF398, KLHL8, TMEM181, HOMEZ, FNIP2, POGK, EPB41L5, ZNF317, PCDHB16, RBAK, PTPN9, PTPRE, PURB, BCAT1, RAB6A, RALB, RAP2A, PLEKHA2, RELA, RIT1, ABCE1, ZFAND3, ROCK1, RPS6KB1, RRBP1, RSU1, TSPAN31, SC5DL, SDC1, SDC2, SDCBP, ZNF335, SEC14L1, SEL1L, ZFYVE20, TMEM168, SGCB, SH3BGRL, CLEC7A, SLC5A3, SLC7A2, PCP4L1, SLC9A2, SNTB2, SOLH, SOS2, SPINK2, STAT1, SUOX, SYK, HNF1B, TEAD1, TEP1, TFAP2A, TIMP2, TRPC1, CAPN5, UBA52, UBE2D3, UBTF, UVRAG, VIPR1, BEST1, ZKSCAN1, ZSCAN21, ZNF91, ZNF136, ZNF223, ZNF229, OTUB2, PCYOX1L, C19orf42, FYCO1, SH3TC2, SCRIN3, DHX40, HHIPL2, QSER1, RPAP2, NRSN2, OPA3, ZNF430, EDEM3, CYB5B, RND2, SNX27, USP9X, TMEM47, TM2D2, PIP5K1A, DTNBP1, RNASEH2C, FYTDD1, C14orf142, ADO, DIRC2, PIK3R3, API5, DISP2, CASK, RUNX2, NCOA1, STX16, SYNJ1, SQSTM1, SLC5A6, PRPF4B, STBD1, CDKL2, EMILIN3, ATP6V0D1, SLC39A13, CHURC1, ZMYM6, PTER, TRIP11, UBE4A, ARHGAP18, KIF3B, ZRANB2, ORMDL3, TP53INP1, MED23, ROCK2, CHST10, SLC4A7, ENTPD1, SEC22B, H6PD, ENTPD4, CD58, CD59, WSCD2, CLINT1, KIAA0562, KIAA0513, KIAA0494, SPATA2, ZBTB24, PLEKHM1, CEP350, TOX4, HELZ, MED13, SLC12A6 |

Supplementary Table 7: Potential influence of the differentially expressed miRNA on mRNA expression levels

| miRNA,<br>mRNA change | Cell line | DE miRNAs | DE miRNA<br>w/Corr.<br>Targets * | DE mRNA    | DE mRNA<br>under<br>miRNA-<br>regulation | % mRNAs<br>under<br>miRNA-<br>regulation** | Odds ratio |
|-----------------------|-----------|-----------|----------------------------------|------------|------------------------------------------|--------------------------------------------|------------|
| Up, Down              | TamR1     | <b>40</b> | 31                               | <b>67</b>  | 44                                       | 65.7                                       | 0.71       |
|                       | TamR4     | <b>51</b> | 33                               | <b>231</b> | 140                                      | 60.6                                       | 0.65       |
|                       | TamR8     | <b>47</b> | 39                               | <b>22</b>  | 12                                       | 54.5                                       | 0.48       |
| Down, Up              | TamR1     | <b>29</b> | 26                               | <b>204</b> | 132                                      | 64.7                                       | 0.88       |
|                       | TamR4     | <b>52</b> | 41                               | <b>205</b> | 145                                      | 70.7                                       | 0.63       |
|                       | TamR8     | <b>48</b> | 33                               | <b>125</b> | 79                                       | 63.2                                       | 0.6        |

Footnote: Direction of change of expression of miRNA/mRNA expression in a TamR cell line is relative to MCF-7/S0.5.

\* refers to the functional miRNA-target relationship;

\*\* refers to functional targets exhibiting differential expression in the same TamR.

DE; differentially expressed. Corr targets; correlated miRNA targets.

Supplementary Table 8: Characteristics of included patients and their breast cancer tumor (N=152)

|                                            | Discovery set    |                  | Test set #1       |                  | Test set #2      |                  |
|--------------------------------------------|------------------|------------------|-------------------|------------------|------------------|------------------|
|                                            | R<br>(n=26)      | N<br>(n=26)      | R<br>(n=30)       | N<br>(n=30)      | R<br>(n=19)      | N<br>(n=21)      |
| <b>Age</b> Avg.<br>(range), years          | 59.2<br>(48-73)  | 62.8<br>(49-74)  | 61.5<br>(49-70)   | 62.7<br>(52-72)  | 59.1<br>(50-72)  | 60<br>(49-72)    |
| <b>Size</b><br>Avg. (range), mm            | 33.19<br>(12-85) | 30.1<br>(14-95)  | 31.4<br>(7-80)    | 26.2<br>(8-58)   | 28.4<br>(8-65)   | 20.5<br>(10-45)  |
| <b>Positive lymph nodes</b><br>Avg (range) | 4.7<br>(0-13)    | 4.5<br>(0-13)    | 8.6<br>(1-29)     | 3.0<br>(0-14)    | 3.3<br>(0-11)    | 1.6<br>(0-8)     |
| <b>ER status</b> (avg./median %)*          | 91.4/95          | 85.9/100         | 77.9/90           | 83.9/83          | 82.4/92.5        | 83.1/90          |
| Positive**                                 | 4                | 1                | 7                 | 12               | 6                | 5                |
| Negative†                                  | 1                | 0                | 1                 | 3                | 0                | 0                |
| Unknown                                    | 0                | 2                | 1                 | 3                | 1                | 0                |
| <b>PgR status</b> (avg./median %)*         | 73.2/80          | 81.3/90          | 65/72.5           | 70.2/80          | 32.9/15          | 36.8/10          |
| Positive**                                 | 3                | 1                | 9                 | 9                | 1                | -                |
| Negative                                   | 6                | 7                | 11                | 5                | 2                | 6                |
| Unknown                                    | 0                | 2                | 2                 | 1                | 5                | 6                |
| <b>Diagnosis</b> (IDC/ILC/unknown)         | 20/6/0           | 20/6/0           | 25/4/1            | 26/3/1           | 15/1/3           | 18/0/3           |
| <b>Tamoxifen</b><br>Avg (range), years     | 1.8<br>(0.3-5.0) | 2.1<br>(0.7-5.0) | 1.7<br>(0.8-5.2)  | 1.6<br>(0.8-5.3) | 3.1<br>(1.7-5.0) | 4.5<br>(2.7-5.0) |
| <b>TTR</b><br>Avg (range), years           | 3.4<br>(0.7-8.7) | -                | 3.7<br>(0.8-14.9) | -                | 3.6<br>(0.8-8.7) | -                |

\*: the average and median were calculated only for the tumors defined as positive, i.e. staining was observed in  $\geq 10\%$  of tumor cells by immunohistochemistry.

\*\* : If the actual percentage was not provided, patients were deemed positive if ER staining was observed in  $\geq 10\%$  of tumor cells by immunohistochemistry and/or target protein (ER or PgR) was  $> 10$  fmol/mg total protein as determined by biochemistry.

†: the 5 ER- tumors had a PgR status of 90 %, 50 %, 90 %, 80 % and IHC+ (i.e.  $> 10\%$ ) respectively.

R: patients with recurrence. N: patients without recurrence. TTR: time to recurrence.
